# Supplementary material for: Fall prevention in community-dwelling adults with mild to moderate cognitive impairment: a systematic review and meta-analysis
Source: PubMed Central journal article supplement (PMC8665555; doi:10.1186/s12877-021-02641-9), 2021-12-10
Supplement: 12877_2021_2641_MOESM1_ESM.pdf [file 12877_2021_2641_MOESM1_ESM.pdf]

**Additional File 1: Search Strategy**  
**COGNITIVE IMPAIRMENT AND**  
**FALLS STRATEGIES**  
**April 24, 2020**

**MEDLINE**

Database: OVID Medline Epub Ahead of Print, In-Process & Other Non-Indexed Citations, Ovid MEDLINE(R) Daily and Ovid MEDLINE(R) 1946 to Present

Search Strategy:

- 
- 1 (falls or faller or fall-related injury or fall prevention or falling or fell or slip\* or trip\* or stumble\* or tumble\*).ti,ab,kw. (390522)
  - 2 Accidental Falls/ (23785)
  - 3 exp Hip Fractures/ (23653)
  - 4 hip fracture?.ti,ab,kw. (16089)
  - 5 or/1-4 (425636)
  - 6 exp cognition disorders/ or delirium/ or exp dementia/ or exp dyslexia, acquired/ (233743)
  - 7 (cognitive\* adj3 (impair\* or dysfunction\* or disorder?)).tw. (89832)
  - 8 (dementia or alzheimer\* or delirium or Lewy body or lewy bodies or acquired dyslexia).ti,ab,kw. (228229)
  - 9 or/6-8 (357690)
  - 10 5 and 9 (8716)
  - 11 exp aged/ (3081904)
  - 12 middle aged/ (4299639)
  - 13 (adult? or individual? or elderly or middle aged or patient? or participant?).tw. (8674917)
  - 14 or/11-13 (10317241)
  - 15 10 and 13 (6319)

**EMBASE**

Search Strategy:

- 
- 1 (falls or faller or fall-related injury or fall prevention or falling or fell or slip\* or trip\* or stumble\* or tumble\*).ti,ab,kw. (489853)
  - 2 falling/ (39901)
  - 3 exp hip injury/ (45150)
  - 4 hip fracture?.ti,ab,kw. (23268)
  - 5 or/1-4 (551697)
  - 6 exp cognitive defect/ (482427)
  - 7 exp delirium/ (30412)
  - 8 exp alexia/ (1351)
  - 9 (cognitive\* adj3 (impair\* or dysfunction\* or disorder?)).tw. (140048)
  - 10 (dementia or alzheimer\* or delirium or Lewy body or lewy bodies or acquired dyslexia).ti,ab,kw. (327336)
  - 11 or/6-10 (584438)
  - 12 5 and 11 (17973)
  - 13 middle aged/ (1489589)
  - 14 aged/ or frail elderly/ or very elderly/ (2940516)
  - 15 (adult? or individual? or elderly or middle aged or patient? or participant?).tw. (11970503)

- 16 or/13-15 (12948341)
- 17 12 and 16 (14171)

## PSYCINFO

Database: APA PsycInfo <1806 to April Week 2 2020>

Search Strategy:

- 
- 1 (falls or faller or fall-related injury or fall prevention or falling or fell or slip\* or trip\* or stumble\* or tumble\*).ti,ab. (46759)
  - 2 falls/ (2827)
  - 3 hips/ and injuries/ (341)
  - 4 hip fracture?.ti,ab. (952)
  - 5 or/1-4 (47762)
  - 6 cognitive impairment/ (36298)
  - 7 exp dementia/ (76142)
  - 8 alzheimer's disease/ (46104)
  - 9 delirium/ (3292)
  - 10 (dementia or alzheimer\* or delirium or Lewy body or lewy bodies or acquired dyslexia).ti,ab. (101697)
  - 11 (cognitive\* adj3 (impair\* or dysfunction\* or disorder?)).tw. (55353)
  - 12 or/6-11 (148802)
  - 13 5 and 12 (2825)

## COCHRANE

- | ID  | Search Hits                                                                                                                 |
|-----|-----------------------------------------------------------------------------------------------------------------------------|
| #1  | MeSH descriptor: [Accidental Falls] explode all trees 1413                                                                  |
| #2  | MeSH descriptor: [Hip Fractures] explode all trees 1581                                                                     |
| #3  | falls or faller or fall-related injury or fall prevention or falling or fell or slip* or trip* or stumble* or tumble* 40978 |
| #4  | hip fracture* 5784                                                                                                          |
| #5  | #1 or #2 or #3 or #4 46088                                                                                                  |
| #6  | MeSH descriptor: [Cognition Disorders] explode all trees 4913                                                               |
| #7  | MeSH descriptor: [Dementia] explode all trees 5736                                                                          |
| #8  | MeSH descriptor: [Delirium] explode all trees 710                                                                           |
| #9  | MeSH descriptor: [Dyslexia, Acquired] explode all trees 10                                                                  |
| #10 | dementia or alzheimer* or delirium or Lewy body or lewy bodies or acquired dyslexia 27884                                   |
| #11 | (cognitive* near/3 (impair* or dysfunction* or disorder?)) 14757                                                            |
| #12 | #6 or #7 or #8 or #9 or #10 or #11 461299                                                                                   |
| #13 | #5 and #12 20701                                                                                                            |
| #14 | MeSH descriptor: [Middle Aged] explode all trees 9402                                                                       |
| #15 | MeSH descriptor: [Aged] explode all trees 7469                                                                              |
| #16 | adult? or individual? or elderly or middle aged or patient? or participant? 1217342                                         |
| #17 | #14 or #15 or 16 217836                                                                                                     |
| #18 | #13 and #17 8654                                                                                                            |

## WEB OF SCIENCE

### Search History:

| Search History                                                                                                              |                       |                                                                                                                       |                    |                      |                             |                               |
|-----------------------------------------------------------------------------------------------------------------------------|-----------------------|-----------------------------------------------------------------------------------------------------------------------|--------------------|----------------------|-----------------------------|-------------------------------|
| Set                                                                                                                         | Results               | Save History / Create Alert                                                                                           | Open Saved History | Edit Sets            | Combine Sets AND OR Combine | Delete Sets Select All Delete |
| # 3                                                                                                                         | <a href="#">7,582</a> | #2 OR #1                                                                                                              |                    | <a href="#">Edit</a> |                             |                               |
| <i>Indexes=SCI-EXPANDED, SSCI, A&amp;HCI, CPCI-S, CPCI-SSH, BKCI-S, BKCI-SSH, ESCI, CCR-EXPANDED, IC Timespan=All years</i> |                       |                                                                                                                       |                    |                      |                             |                               |
| # 2                                                                                                                         | <a href="#">839</a>   | TI=(cognitive impairment OR Alzheimer* OR dementia OR delirium or acquired dyslexia) AND TI= (fall* OR hip fracture*) |                    | <a href="#">Edit</a> |                             |                               |
| <i>Indexes=SCI-EXPANDED, SSCI, A&amp;HCI, CPCI-S, CPCI-SSH, BKCI-S, BKCI-SSH, ESCI, CCR-EXPANDED, IC Timespan=All years</i> |                       |                                                                                                                       |                    |                      |                             |                               |
| # 1                                                                                                                         | <a href="#">7,582</a> | TS=(cognitive impairment OR Alzheimer* OR dementia OR delirium or acquired dyslexia) AND TS= (fall* OR hip fracture*) |                    | <a href="#">Edit</a> |                             |                               |
| <i>Indexes=SCI-EXPANDED, SSCI, A&amp;HCI, CPCI-S, CPCI-SSH, BKCI-S, BKCI-SSH, ESCI, CCR-EXPANDED, IC Timespan=All years</i> |                       |                                                                                                                       |                    |                      |                             |                               |

## SCIENCE DIRECT

Cognitive impairment and falls

Dementia and falls

Delirium and falls

Acquired dyslexia and falls

Alzheimer and falls

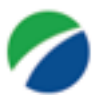

| #   | Query                                                                            | Limiters/Expanders                                                     | Last Run Via                                                                                        | Results   |
|-----|----------------------------------------------------------------------------------|------------------------------------------------------------------------|-----------------------------------------------------------------------------------------------------|-----------|
| S15 | S11 AND S14                                                                      | Expanders - Apply equivalent subjects<br>Search modes - Boolean/Phrase | Interface - EBSCOhost<br>Research Databases<br>Search Screen - Advanced Search<br>Database - CINAHL | 6,114     |
| S14 | S12 OR S13                                                                       | Expanders - Apply equivalent subjects<br>Search modes - Boolean/Phrase | Interface - EBSCOhost<br>Research Databases<br>Search Screen - Advanced Search<br>Database - CINAHL | 3,552,831 |
| S13 | TX (adult* or individual* or elderly or middle aged or patient* or participant*) | Expanders - Apply equivalent subjects<br>Search modes - Boolean/Phrase | Interface - EBSCOhost<br>Research Databases<br>Search Screen - Advanced Search<br>Database - CINAHL | 3,552,740 |
| S12 | (MH "Aged+") OR (MH "Middle Age")                                                | Expanders - Apply equivalent subjects<br>Search modes - Boolean/Phrase | Interface - EBSCOhost<br>Research Databases<br>Search Screen - Advanced Search<br>Database - CINAHL | 1,340,547 |
| S11 | S5 AND S10                                                                       | Expanders - Apply equivalent subjects                                  | Interface - EBSCOhost                                                                               | 6,835     |

|     |                                                                                                         |                                                                              |                                                                                                           |         |
|-----|---------------------------------------------------------------------------------------------------------|------------------------------------------------------------------------------|-----------------------------------------------------------------------------------------------------------|---------|
|     |                                                                                                         | Search modes -<br>Boolean/Phrase                                             | Research Databases<br>Search Screen -<br>Advanced Search<br>Database - CINAHL                             |         |
| S10 | S6 OR S7 OR S8<br>OR S9                                                                                 | Expanders - Apply<br>equivalent subjects<br>Search modes -<br>Boolean/Phrase | Interface -<br>EBSCOhost<br>Research Databases<br>Search Screen -<br>Advanced Search<br>Database - CINAHL | 148,266 |
| S9  | TX (cognitive* n3<br>(impair* or<br>dysfunction* or<br>disorder*))                                      | Expanders - Apply<br>equivalent subjects<br>Search modes -<br>Boolean/Phrase | Interface -<br>EBSCOhost<br>Research Databases<br>Search Screen -<br>Advanced Search<br>Database - CINAHL | 36,921  |
| S8  | TX (dementia or<br>alzheimer* or<br>delirium or Lewy<br>body or lewy<br>bodies or acquired<br>dyslexia) | Expanders - Apply<br>equivalent subjects<br>Search modes -<br>Boolean/Phrase | Interface -<br>EBSCOhost<br>Research Databases<br>Search Screen -<br>Advanced Search<br>Database - CINAHL | 111,590 |
| S7  | (MH "Dyslexia,<br>Pure (Acquired)")<br>OR (MH "Dyslexia,<br>Surface<br>(Acquired)")                     | Expanders - Apply<br>equivalent subjects<br>Search modes -<br>Boolean/Phrase | Interface -<br>EBSCOhost<br>Research Databases<br>Search Screen -<br>Advanced Search<br>Database - CINAHL | 10      |
| S6  | (MH "Cognition<br>Disorders+") OR<br>(MH "Dementia+")                                                   | Expanders - Apply<br>equivalent subjects<br>Search modes -                   | Interface -<br>EBSCOhost<br>Research Databases                                                            | 107,698 |

|    |                                                                                                                                            |                                                                              |                                                                                                           |         |
|----|--------------------------------------------------------------------------------------------------------------------------------------------|------------------------------------------------------------------------------|-----------------------------------------------------------------------------------------------------------|---------|
|    | OR (MH "Delirium")                                                                                                                         | Boolean/Phrase                                                               | Search Screen -<br>Advanced Search<br>Database - CINAHL                                                   |         |
| S5 | S1 OR S2 OR S3<br>OR S4                                                                                                                    | Expanders - Apply<br>equivalent subjects<br>Search modes -<br>Boolean/Phrase | Interface -<br>EBSCOhost<br>Research Databases<br>Search Screen -<br>Advanced Search<br>Database - CINAHL | 146,614 |
| S4 | TX hip fracture*                                                                                                                           | Expanders - Apply<br>equivalent subjects<br>Search modes -<br>Boolean/Phrase | Interface -<br>EBSCOhost<br>Research Databases<br>Search Screen -<br>Advanced Search<br>Database - CINAHL | 13,333  |
| S3 | TX falls or faller or<br>fall-related injury<br>or fall prevention<br>or falling or fell or<br>slip* or trip* or<br>stumble* or<br>tumble* | Expanders - Apply<br>equivalent subjects<br>Search modes -<br>Boolean/Phrase | Interface -<br>EBSCOhost<br>Research Databases<br>Search Screen -<br>Advanced Search<br>Database - CINAHL | 135,201 |
| S2 | (MH "Hip<br>Fractures+")                                                                                                                   | Expanders - Apply<br>equivalent subjects<br>Search modes -<br>Boolean/Phrase | Interface -<br>EBSCOhost<br>Research Databases<br>Search Screen -<br>Advanced Search<br>Database - CINAHL | 10,625  |
| S1 | (MH "Accidental<br>Falls")                                                                                                                 | Expanders - Apply<br>equivalent subjects<br>Search modes -                   | Interface -<br>EBSCOhost<br>Research Databases                                                            | 24,279  |

Boolean/Phrase

Search Screen -  
Advanced Search  
Database - CINAHL
